# Supplementary material for: Atomic layer deposition of TiO2 shells on MoO3 nanobelts allowing enhanced lithium storage performance
Source: Royal Society of Chemistry journal article supplement (doi:10.1039/c8cc04282a), 2018-01-01
Supplement: c8cc04282a1.pdf [file c8cc04282a1.pdf]

## Supporting Information

### Atomic Layer Deposition of TiO<sub>2</sub> Shells on MoO<sub>3</sub> Nanobelts Allowing Enhanced Lithium Storage Performance

Sanmu Xie,<sup>a,†</sup> Daxian Cao,<sup>a,†</sup> Yiyi She,<sup>b</sup> Hongkang Wang,<sup>a,\*</sup> Jianwen Shi,<sup>a</sup> Micheal K H Leung,<sup>b</sup> Chunming Niu<sup>a</sup>

<sup>a</sup> Center of Nanomaterials for Renewable Energy (CNRE), State Key Lab of Electrical Insulation and Power Equipment, School of Electrical Engineering, Xi'an Jiaotong University, Xi'an 710049, P. R. China

<sup>b</sup> Ability R&D Energy Research Centre (AERC), School of Energy and Environment, City University of Hong Kong, Hong Kong SAR.

<sup>†</sup> These authors contribute equally to this work.

\*Corresponding author: [hongkang.wang@mail.xjtu.edu.cn](mailto:hongkang.wang@mail.xjtu.edu.cn)

## Experimental Section

### Material synthesis.

*Synthesis of MoO<sub>3</sub> nanobelts.* MoO<sub>3</sub> nanobelts were synthesized *via* hydrothermal method. In a typical synthesis, 2.0 g ammonium molybdate powder was first dissolved in 30 mL deionized water under magnetic stirring to form a clear solution. Afterwards, 10 mL nitrogen acid was added into by drop-by-drop under continuous stirring for 2 h. The mixture was then transferred to a Teflon lined stainless steel autoclave, which was kept at 180 °C for 24 h. After naturally cooling down to room temperature, MoO<sub>3</sub> nanobelts were obtained after washing with distilled water and ethanol for several times, which were then dried at 80 °C for 12 h in the oven.

*Atomic layer deposition (ALD) of TiO<sub>2</sub> layers on MoO<sub>3</sub> nanobelts.* A home-made ALD system (Figure S1) was used for the deposition of TiO<sub>2</sub> layers on MoO<sub>3</sub> nanobelts. In a typical ALD cycle, MoO<sub>3</sub> nanobelts in vacuum were alternately exposed into the TiCl<sub>4</sub> and H<sub>2</sub>O gases, thus the atomic layer adsorption of TiCl<sub>4</sub> and H<sub>2</sub>O can react on the surface of MoO<sub>3</sub>, producing an atomic layer of TiO<sub>2</sub>. Desired thickness of TiO<sub>2</sub> shells can be obtained by repeating the ALD cycle (Figure S2).

### Materials Characterization.

Powder X-ray diffraction (XRD) patterns of the products were obtained on a Bruker D2 PHASER X-ray diffractometer using Cu K $\alpha$  radiation ( $\lambda = 1.5418$  Å) with an operating voltage of 30 kV and a current of 10 mA. Scanning electron microscope (SEM) was performed on an FEI Quanta 250 SEM. Transmission electron microscope (TEM) and high-resolution TEM (HRTEM) were carried out on a JEOL JEM2100 TEM operated at 200 kV. Energy-dispersive X-ray spectroscopy (EDS) was performed on JEM-F200 Field Emission TEM instrument. X-ray photoelectron spectroscopy (XPS) was performed on a Thermo Fisher ESCALAB 250Xi instrument. All the binding energies were calibrated by referring to the C 1s peak at 284.6 eV.

### Electrochemical Measurements.

Electrochemical properties were examined using CR2025 coin-type cells assembled in an Ar-filled glovebox with both  $\text{H}_2\text{O}$  and  $\text{O}_2$  content less than 1.0 ppm. The working electrode was prepared by casting aqueous slurry consisted of active material, acetylene black and polyacrylic acid (PAA) binder with a weight ratio of 80:10:10, followed by drying at 120 °C under vacuum overnight. Lithium foil was used as the counter electrode, and microporous membrane (Celgard 2400) was used as the separator. An electrolyte containing 1 M  $\text{LiPF}_6$  dissolved in a mixture of ethylene carbonate/dimethyl carbonate with a volume ratio of 1:1. Galvanostatic discharge/charge tests of the cells were carried out on a battery test system (NEWARE BTS, Neware Technology Co., Ltd., China) in the range of 0.01-3.0 V (vs.  $\text{Li/Li}^+$ ) at room temperature (25 °C). Cyclic voltammetry (CV) was carried out on an electrochemical station (Autolab PGSTAT 302 N) in the range of 0.01-3.0 V at a scan rate of 0.2 mV/s. Electrochemical impedance spectroscopy (EIS) was performed in the frequency range of 10 MHz-0.01 Hz with a voltage amplitude of 5 mV using CHI600E electrochemical station. The specific capacities were based on the mass of the active materials with average loading amount of approximately 1.0  $\text{mg}/\text{cm}^2$ .

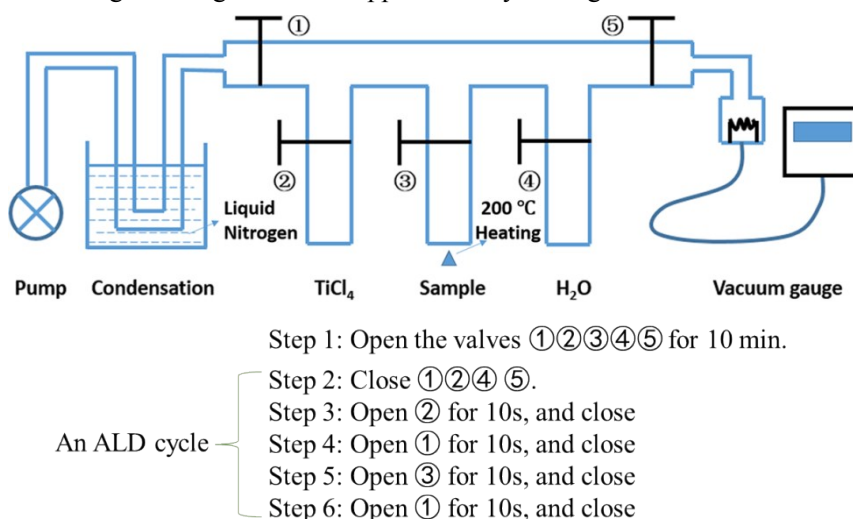

Figure S1. Schematic illustration of the home-made ALD setup and the ALD cycling process.

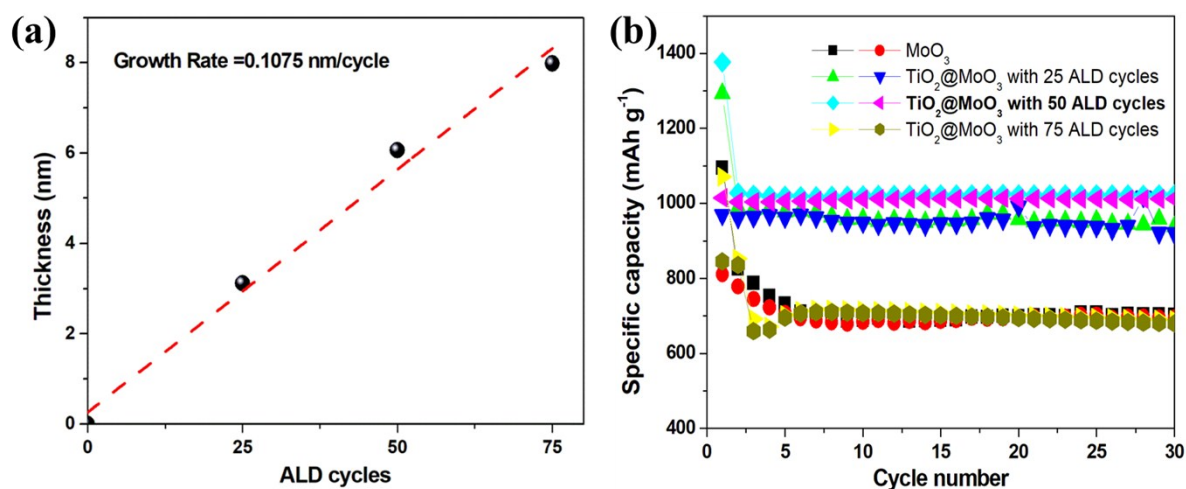

Figure S2. (a) Relationship of  $\text{TiO}_2$  thickness along with ALD cycle numbers, and (b) the effect of ALD cycles on the electrochemical properties of  $\text{TiO}_2@/\text{MoO}_3$ .

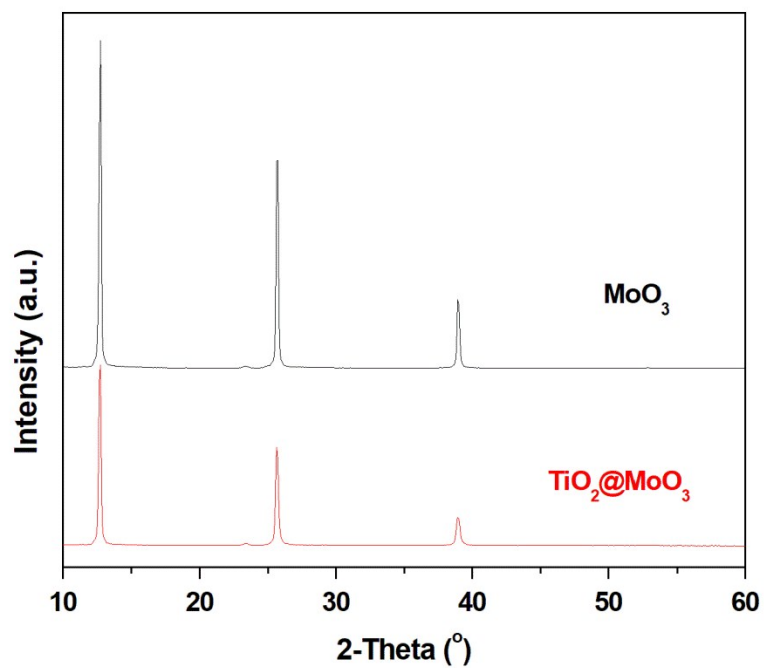

Figure S3. XRD patterns of the the  $\text{MoO}_3$  and  $\text{TiO}_2@\text{MoO}_3$  nanobelts.

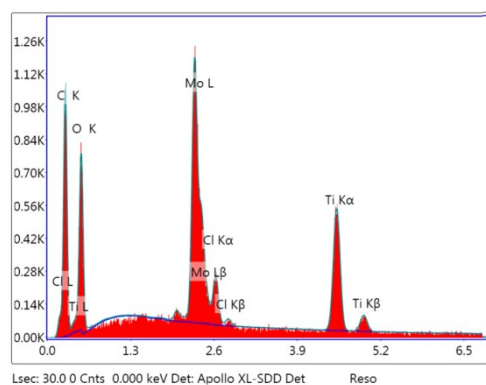

Figure S4. EDS spectrum of  $\text{TiO}_2@\text{MoO}_3$  nanobelts.

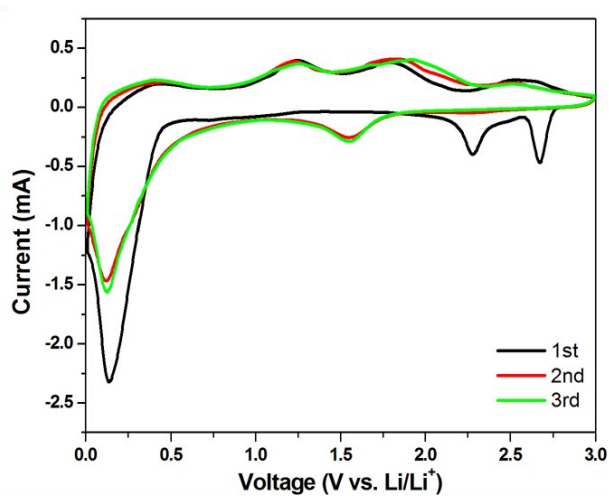

Figure S5. CV curves of the commercial  $\text{MoO}_3$  (Macklin, AR, 99.5%).

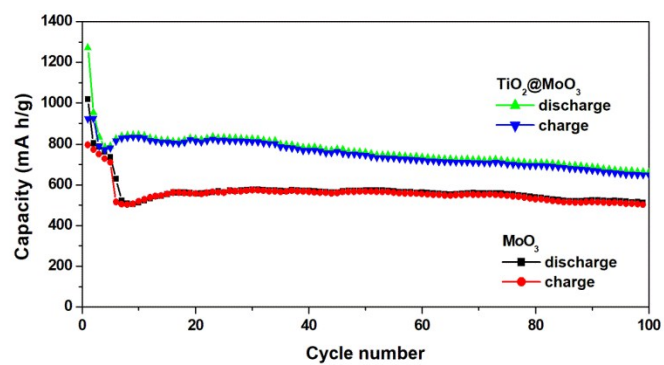

Figure S6. Cycle performance of the  $\text{MoO}_3$  and  $\text{TiO}_2@\text{MoO}_3$  at a high-rate of  $1 \text{ A g}^{-1}$ . For  $\text{MoO}_3$  electrode, a lower current density was applied in the first five cycles.

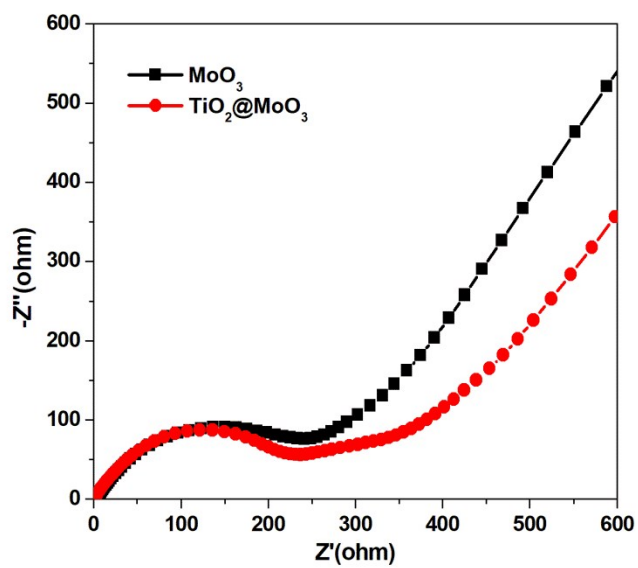

Figure S7. Nyquist plots of the  $\text{MoO}_3$  and  $\text{TiO}_2@\text{MoO}_3$  electrodes before cycling.
